# Supplementary material for: Conjugated polymers consisting of quinacridone and quinoxaline as donor materials for organic photovoltaics: orientation and charge transfer properties of polymers formed by phenyl structures with a quinoxaline derivative
Source: Royal Society of Chemistry journal article supplement (doi:10.1039/c3ta10512a), 2013-01-01
Supplement: c3ta10512a.pdf [file c3ta10512a.pdf]

## Supporting Information

### Conjugated Polymers Consisting of Quinacridone and Quinoxaline as Donor Materials for Organic Photovoltaics: Orientation and Charge Transfer Properties of Polymers Formed by Phenyl Structures with a Quinoxaline Derivative

*Ho-Jun Song, Doo-Hun Kim, Eui-Jin Lee, Doo-Kyung Moon\**

Department of Materials Chemistry and Engineering, Konkuk University, 1 Hwayang-dong, Gwangjin-gu, Seoul 143-701, Republic of Korea.

E-mail: dkmoon@konkuk.ac.kr

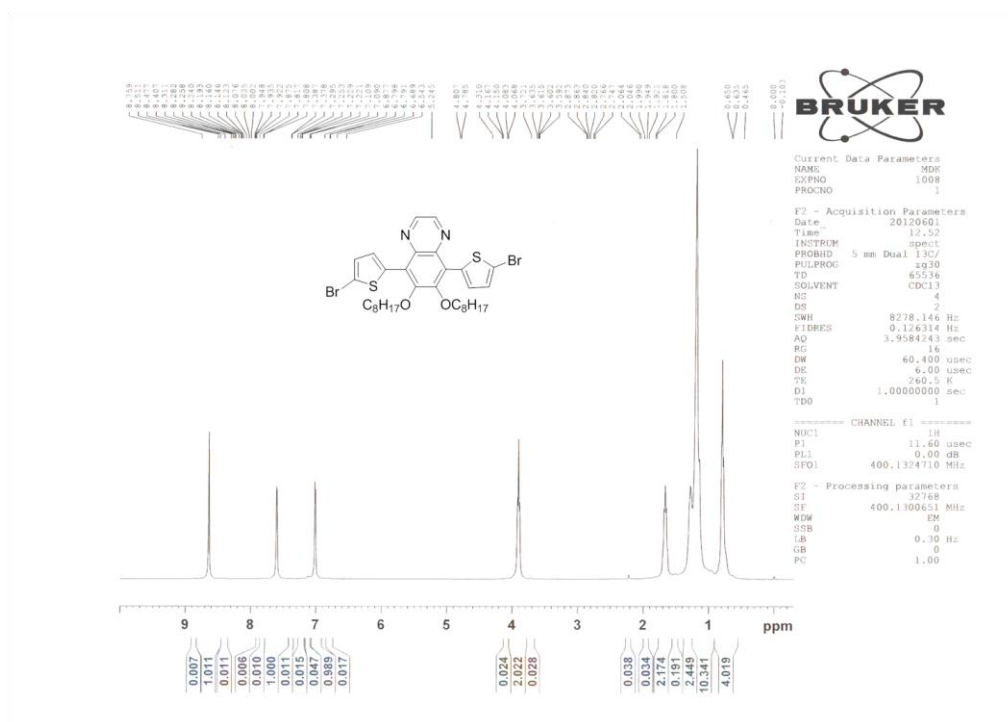

**Figure S1. <sup>1</sup>H-NMR of M2**

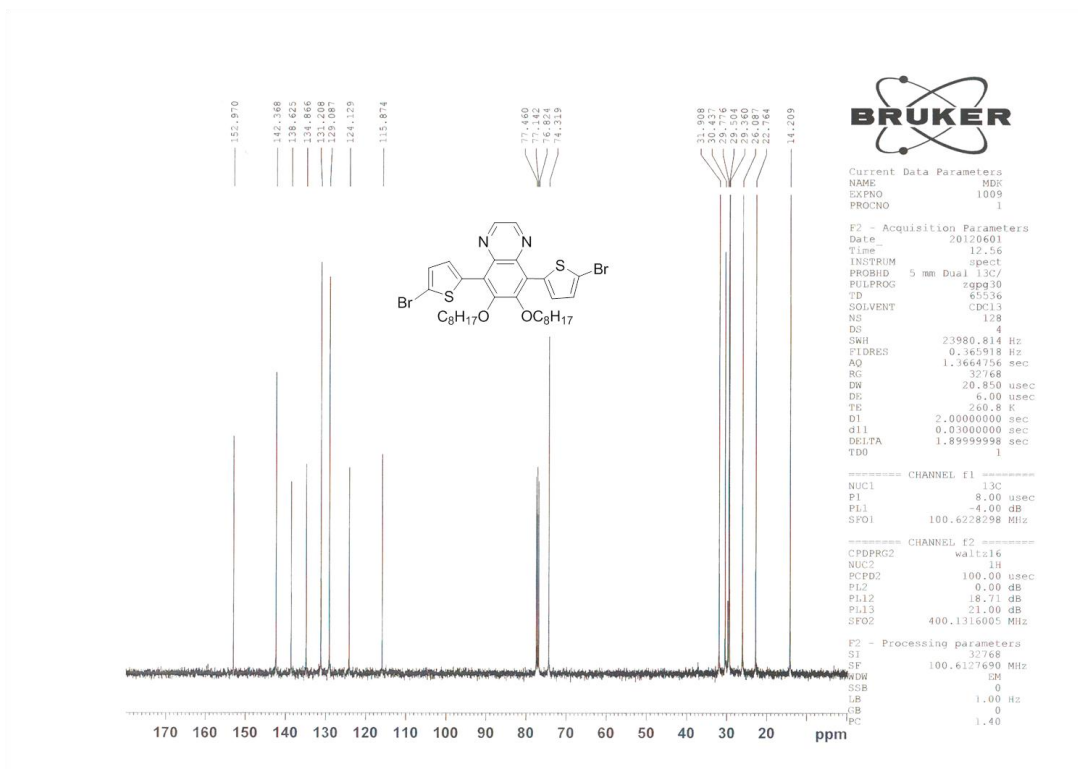

Figure S2. <sup>13</sup>C-NMR of M2

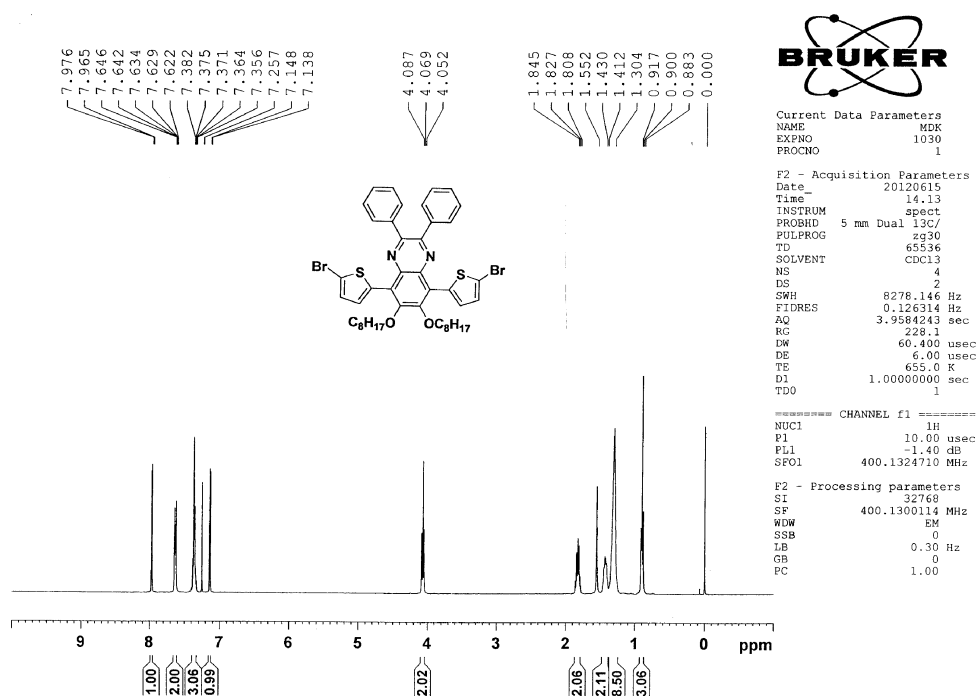

Figure S3. <sup>1</sup>H-NMR of M3

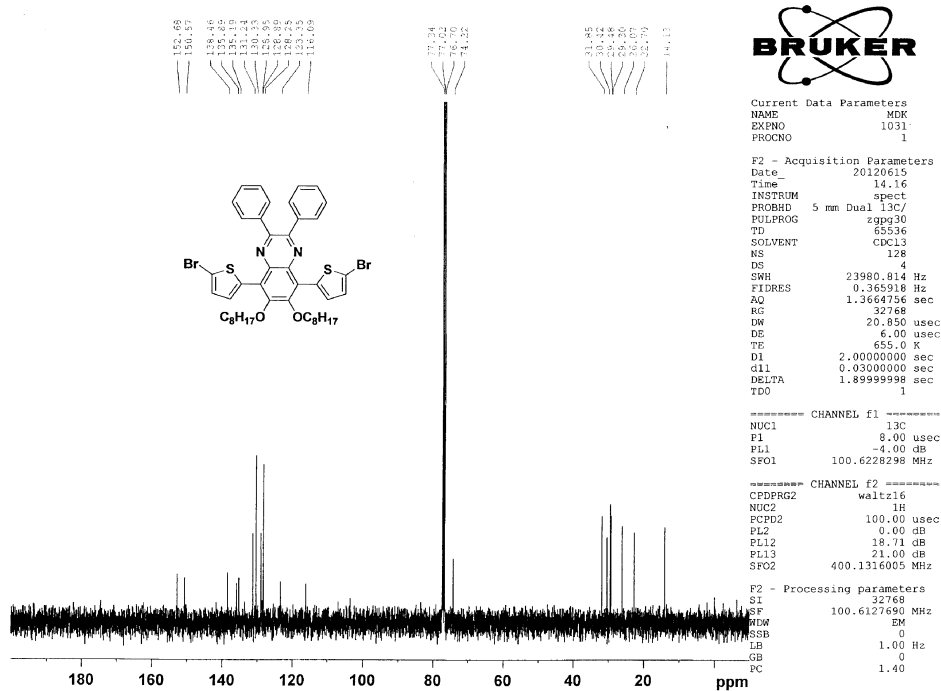

Figure S4. <sup>13</sup>C-NMR of M3

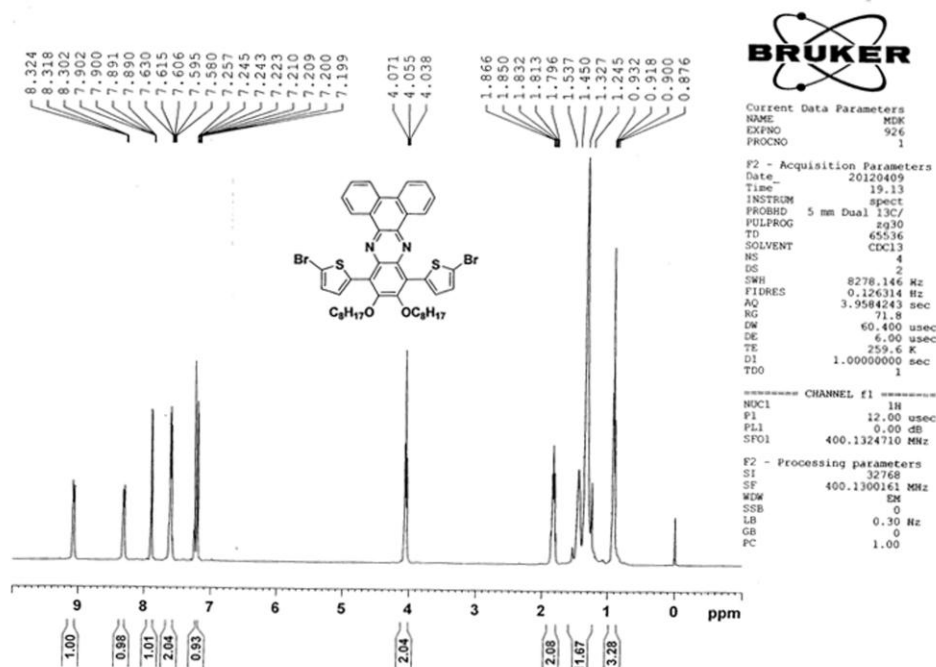

Figure S5. <sup>1</sup>H-NMR of M4

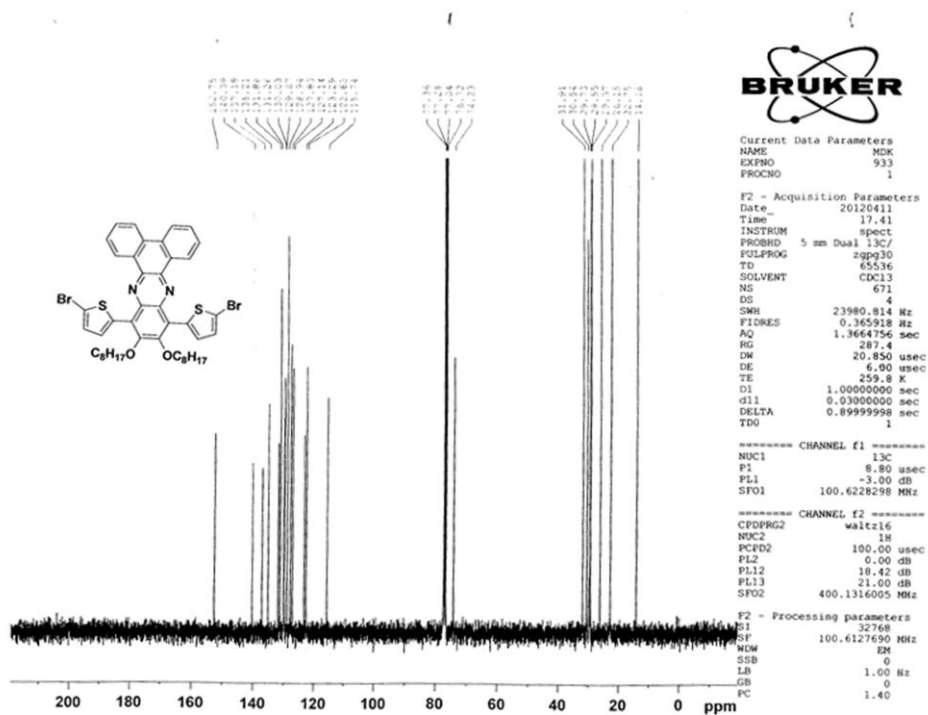

Figure S6.  $^{13}\text{C}$ -NMR of M4

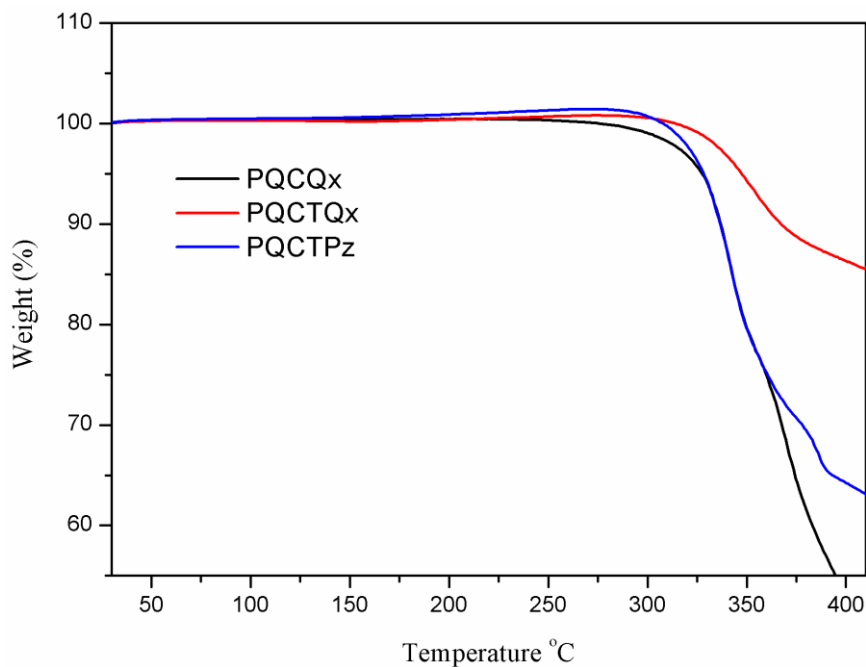

Figure S7. TGA data of polymers

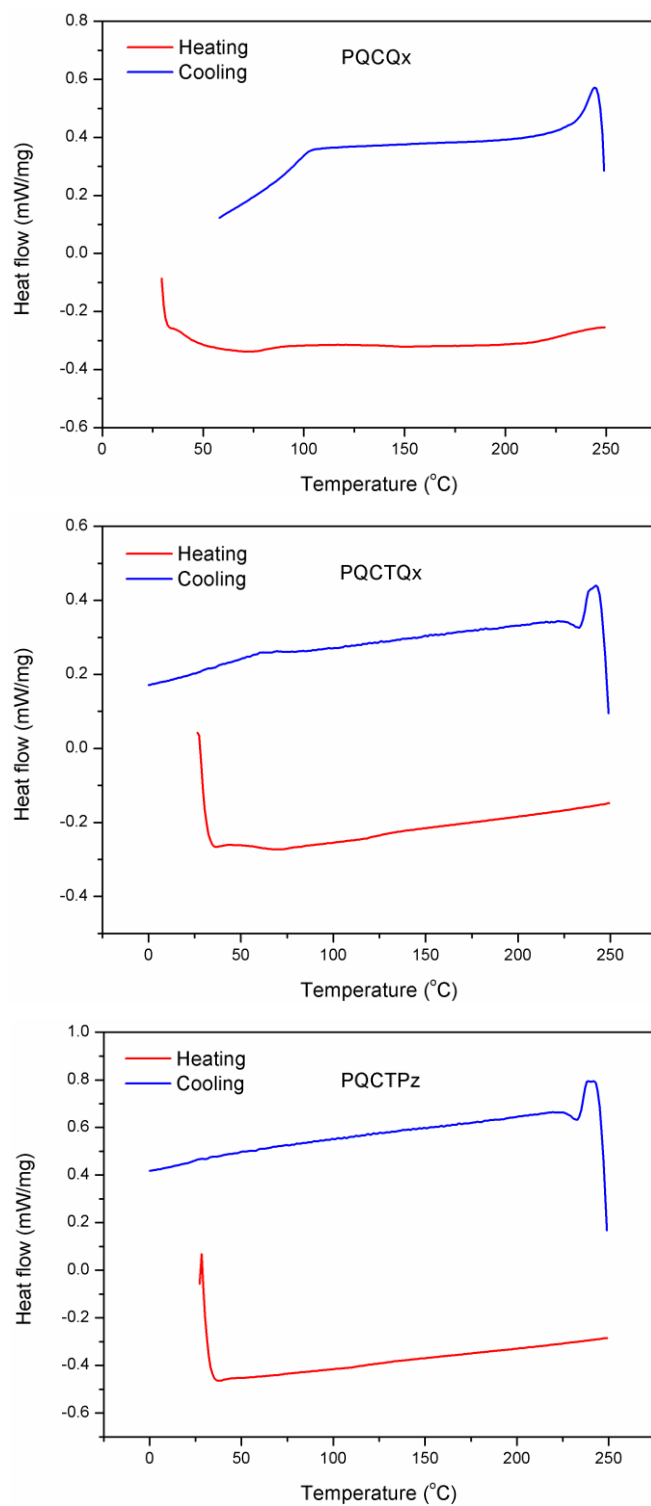

**Figure S8.** DSC data of polymers

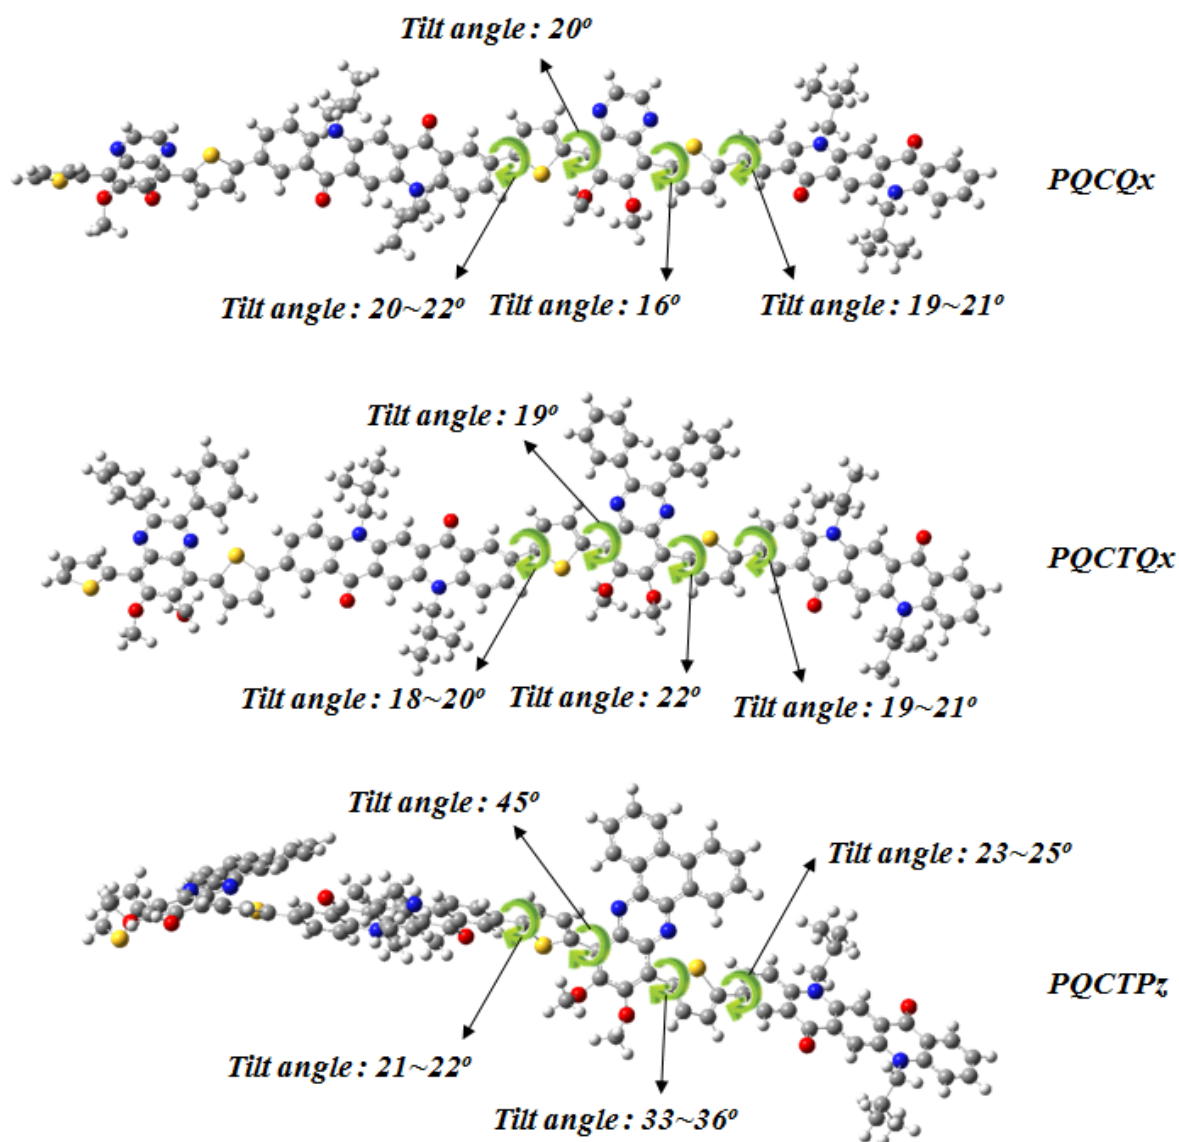

**Figure S9.** Dihedral angle of polymers through the 6-31G\* basis set in Gaussian09
